abuse and gambling, conducted during 2014. The questionnaire consisted of 158 items. The first part was on socio-demographic characteristics. The second was on lifestyle characteristics with Beverage Specific Quantity Frequency - BSQF Instrument developed during Standardized measurement of Alcohol-related troubles-SMART project, Kessler psychological distress scale, Problem Gambling Severity Index (PGSI), use of illicit drugs, and prescription/ non-medical prescription drug use. The sports betting was assessed with yes/ no question: 'Have you played sports betting in the past 30 days?'

**Results:**

The 10% of participants reported sports betting in the past 30 days. The sports betting was associated with being male (OR:11.22, 95% CI: 7.62-16.53), aged 18-44 (OR: 2.33, 95% CI: 1.78-3.07), living in urban areas (OR: 1.79, 95%CI: 1.41-2.28), being single (OR: 1.35, 95 % CI: 1.06-1.72), having secondary education (OR: 1.47, 95% CI: 1.09-1.98), being unemployed (OR: 2.71, 95% CI:1.35-5.45), employed (OR: 3.00, 95 % CI: 1.53-5.90), or student (OR: 3.86, 95% CI: 1.83-8.17), binge-drinking (OR: 1.94, 95% CI: 1.39-2.71), non-medical prescription drug use (OR: 1.78, 95% CI: 1.22-2.59) and low/ moderate (OR: 12.82, 95% CI: 8.50-19.33), and problem gambling (OR: 43.38, 95% CI: 11.75-160.11).

**Conclusions:**

The association of sports betting with risk behaviors among young males should be a concern for public health authorities.

**Key messages:**

- The prevalence of the past 30 days betting in Serbia is 10%.
- Sports betting is associated with risk behaviors.

## Sports betting in Serbia- National survey on lifestyles in Serbia: substance abuse and gambling

Jovana Todorovic

J Todorovic<sup>1</sup>, Z Terzic-Supic<sup>1</sup>, P Pipera<sup>2</sup>, J Divjak<sup>1</sup>

<sup>1</sup>Institute of Social Medicine, Medical Faculty, Belgrade University, Belgrade, Serbia

<sup>2</sup>University of Belgrade, Faculty of Medicine, Department of Humanities, Belgrade, Serbia

Contact: jovana.todorovic@med.bg.ac.rs

**Background:**

Sports betting has been one of the gambling games which are strongly associated with problem gambling. The aim of our study was to examine the association of social (socio-demographic and socio-economic) and lifestyle characteristics of sports bettors in Serbia.

**Methods:**

The cross-sectional study was the secondary analysis of the data from the National Survey on lifestyles in Serbia: substance
